# Supplementary material for: A New Approach to 3D Modeling of Inhomogeneous Populations of Viral Regulatory RNA
Source: Viruses. 2020 Sep 29;12(10):1108. doi: 10.3390/v12101108 (PMC7650772; doi:10.3390/v12101108)
Supplement: Supplementary file 1 [file viruses-12-01108-s001.zip]

Archive with 4 entries (4 files):
- viruses-871804-suppr1.pdf
- MOVIE 1 x rotation 2020Jun18_smaller.mp4
- MOVIE 2 x rotation 2020Jun18_smaller.mp4
- MOVIE 3 x rotation 2020Jun18_smaller.mp4
